# Supplementary material
Source: MDPI journal article supplement (https://www.mdpi.com/2073-4395/13/1/266)
Supplement: s1 [file s1]

**Table S1A:** Parental inbred lines used in the factorial mating scheme

| Inbred No. | Pedigree                                                                                           | Group <sup>1</sup> | Description              |
|------------|----------------------------------------------------------------------------------------------------|--------------------|--------------------------|
| 1          | 9450xKI21-1-5-3-2-2-B/DE3/9450xKI21-1-5-3-2-2-B-32-B*6                                             | I                  | High Zn and High PVA     |
| 2          | (9450xKI21-1-5-2-1-2-B/DE3/9450xKI21-1-5-2-1-2-B)-16-B*5                                           | I                  | High Zn and High PVA     |
| 3          | 9450xKI21-1-5-3-2-2-B/DE3/9450xKI21-1-5-3-2-2-B-23-B*6                                             | I                  | High Zn and High PVA     |
| 4          | 4205/DE3/4205-20-B*7                                                                               | 1                  | High Zn and High PVA     |
| 5          | (9450/CM116/9450)-3-3-1-2-1-B*7/9450/KI21-1-5-3-2-2-B/DE3/9450/KI21-1-5-3-2-2-B-30-BB-19-B-2-B-B-1 | II                 | High Zn and High PVA     |
| 6          | (9450/CM116/9450)-3-3-1-2-1-B*7/9450/KI21-1-5-3-2-2-B/DE3/9450/KI21-1-5-3-2-2-B-30-BB-8-B-1-B      | II                 | High Zn and High PVA     |
| 7          | 4205/DE3/4205-16-B*8                                                                               | II                 | High Zn and High PVA     |
| 8          | (ACR97TZL-CCOMP1-Y-S3-13-1-BB/CI7/ACR97TZL-CCOMP1-Y-S3-13-1-BB)-8-B*5                              | II                 | High Zn and High PVA     |
| 9          | ATPS7-24y-B/4001/B73LPA/4001-9-2-1-B*4-21-B-1-B-1                                                  | III                | High Zn and Low PVA      |
| 10         | CamI9P117-B*4                                                                                      | III                | High Zn and Low PVA      |
| 11         | KU1414xCM117-1xKU1414-7-2-B*12                                                                     | III                | High Zn and Low PVA      |
| 12         | ATPS7-24y-B/4001/B73LPA/4001-9-2-1-B*4-26-B-1-B-1                                                  | III                | High Zn and Low PVA      |
| 13         | (IYFCO-22-2-2)-B-2                                                                                 | IV                 | Low Zn and Low PVA       |
| 14         | 4205/DE3/4205-16-B*8                                                                               | IV                 | Low Zn and Low PVA       |
| 15         | (9450xCM116x9450)-5-1-3-1-B*7                                                                      | IV                 | Low Zn and Low PVA       |
| 16         | KU1409xMO17LPAxKU1409-27-3-1-1-BB/(CIM116xTZMi302xCIM116)-2-2-B*8-15-B*4                           | IV                 | Low Zn and Low PVA       |
| 17         | (IYFCO-93-3-1)-B-1                                                                                 | V                  | Low Zn & Fe and High PVA |
| 18         | IYFCO-10-2-1-1-1                                                                                   | V                  | Low Zn & Fe and High PVA |
| 19         | IYFCO-20-1-1-3-3                                                                                   | V                  | Low Zn & Fe and High PVA |
| 20         | (KU1409/DE3/KU1409) S2-2-B*7                                                                       | V                  | Low Zn & Fe and High PVA |
| 21         | (IYFCO-193-2-2)-B-2                                                                                | VI                 | Low Zn and Medium PVA    |
| 22         | (9450/CM116/9450)-3-3-1-2-1-B*7/9450/KI21-1-5-3-2-2-B/DE3/9450/KI21-1-5-3-2-2-B-30-BB-3-B-1-B      | VI                 | Low Zn and Medium PVA    |
| 23         | (KU1409/DE3/KU1409) S2-18-2-BBB/(KU1409/SC55/KU1409)-S2-19-1-BBB-8-B-1-B-B-1                       | VI                 | Low Zn and Medium PVA    |
| 24         | 4013-B/4001/KI21-3-2-1-1-1-B*4-6-B-1-B-1                                                           | VI                 | Low Zn and Medium PVA    |

Group <sup>1</sup> number referring to groups each containing four sets of lines

PVA: Provitamin A

**Table S1B.** Description of crossing scheme for each mating set used to generate hybrids

| Mating Sets | Description | No. of hybrids |
|-------------|-------------|----------------|
| 1           | GI X GIII   | 16             |
| II          | GIII X GII  | 16             |
| III         | GV X GI     | 16             |
| IV          | GIV X GVI   | 16             |
| V           | GII X GIV   | 16             |
| V1          | GVI X GV    | 16             |

G: groups, see Table S1 for description of groups

**Table S2.** Means squares from analysis of variance for grainZn, Fe and PVA concentrations of 24 parental lines across environments.

| Source          | DF | Zn (mg kg <sup>-1</sup> ) | Fe (mg kg <sup>-1</sup> ) | PVA(μg g <sup>-1</sup> ) |
|-----------------|----|---------------------------|---------------------------|--------------------------|
| Env             | 3  | 47.67 **                  | 73.53**                   | 23.87**                  |
| Rep (Env)       | 4  | 6.55                      | 1.16                      | 2.46*                    |
| Block (Env*Rep) | 40 | 7.35                      | 3.77                      | 0.60                     |
| Lines           | 23 | 66.47**                   | 32.19**                   | 34.59**                  |
| Env*Lines       | 69 | 0.13                      | 6.86**                    | 2.31**                   |
| Error           | 52 | 5.51                      | 129.39                    | 0.90                     |
| R <sup>2</sup>  |    | 0.94                      | 0.93                      | 0.98                     |
| CV%             |    | 7.00                      | 7.12                      | 11.77                    |
| Heritability    |    | 0.94                      | 0.80                      | 0.96                     |

\*: significant at p <0.05, \*\*:significant at p<0.01, PVA: provitamin A, Env: environment, Rep: replication  
CV%: coefficient of variation in %, R<sup>2</sup> %: percentage of variation explained, DF: degree of freedom

**Table S3.** Estimates of Specific Combining Ability (SCA) effects for micronutrients and grain yield in 96 hybrids evaluated across environments

| S/N | Hybrid | Set | PVA<br>$\mu\text{g g}^{-1}$ | Fe<br>$\text{mg kg}^{-1}$ | Zn<br>$\text{mg kg}^{-1}$ | GY<br>$\text{t ha}^{-1}$ |
|-----|--------|-----|-----------------------------|---------------------------|---------------------------|--------------------------|
| 1   | 1 x 9  | I   | -0.38                       | -0.26                     | 0.10                      | 0.03                     |
| 2   | 2 x 9  | I   | -0.46                       | 0.01                      | 0.13                      | 0.03                     |
| 3   | 3 x 9  | I   | 0.65*                       | 0.04                      | 0.77                      | -0.02                    |
| 4   | 4 x 9  | I   | 0.13                        | 0.19                      | 0.65                      | 0.02                     |
| 5   | 1 x10  | I   | -0.34                       | -0.43                     | -0.04                     | -0.01                    |
| 6   | 2 x10  | I   | 0.73*                       | 1.16*                     | 1.38*                     | -0.12                    |
| 7   | 3 x10  | I   | -0.21                       | -0.66                     | -0.94                     | 0.01                     |
| 8   | 4x 10  | I   | -0.27                       | -0.17                     | 0.17                      | 0.07                     |
| 9   | 1 x 11 | I   | 0.23                        | 1.33*                     | 0.69                      | -0.03                    |
| 10  | 2 x 11 | I   | -0.28                       | -0.39                     | 0.31                      | 0.02                     |
| 11  | 3 x 11 | I   | -0.19                       | 0.30                      | 0.25                      | -0.08                    |
| 12  | 4 x 11 | I   | 0.11                        | -0.32                     | -0.54                     | 0.01                     |
| 13  | 1 x 12 | I   | 0.36                        | 0.59                      | 1.01*                     | 0.02                     |
| 14  | 2 x 12 | I   | -0.03                       | -0.84*                    | -2.44**                   | 0.02                     |
| 15  | 3 x 12 | I   | -0.36                       | 0.17                      | -0.01                     | 0.04                     |
| 16  | 4 x 12 | I   | 0.07                        | 0.05                      | 1.19*                     | -0.04                    |
| 17  | 9 x 5  | II  | -0.14                       | 0.29                      | 0.46                      | 0.03                     |
| 18  | 10 x 5 | II  | -0.22                       | -0.55                     | -0.59                     | 0.00                     |
| 19  | 11 x 5 | II  | -0.04                       | 0.13                      | 0.36                      | -0.04                    |
| 20  | 12 x 5 | II  | 0.18                        | 0.51                      | 0.17                      | 0.02                     |
| 21  | 9 x 6  | II  | -0.11                       | 0.47                      | 0.87                      | 0.00                     |
| 22  | 10 x 6 | II  | 0.42                        | -0.39                     | 0.28                      | 0.02                     |
| 23  | 11 x 6 | II  | -0.51                       | 0.15                      | -0.54                     | -0.03                    |
| 24  | 12 x 6 | II  | 0.43                        | -0.02                     | 1.07*                     | 0.01                     |
| 25  | 9 x 7  | II  | 0.45                        | -0.31                     | 0.22                      | 0.00                     |

Table S3 contd.

| S/N | Hybrid  | Set | PVA<br>$\mu\text{g g}^{-1}$ | Fe<br>$\text{mg kg}^{-1}$ | Zn<br>$\text{mg kg}^{-1}$ | GY<br>$\text{t ha}^{-1}$ |
|-----|---------|-----|-----------------------------|---------------------------|---------------------------|--------------------------|
| 26  | 10 x 7  | II  | -0.34                       | 0.58                      | 0.54                      | 0.00                     |
| 27  | 11 x 7  | II  | -0.17                       | 0.02                      | 0.53                      | -0.01                    |
| 28  | 12 x 7  | II  | 0.01                        | -0.12                     | -0.01                     | 0.00                     |
| 29  | 9 x 8   | II  | -0.23                       | -0.49                     | -0.63                     | 0.04                     |
| 30  | 10 x 8  | II  | 0.06                        | 0.01                      | 0.52                      | 0.00                     |
| 31  | 11 x 8  | II  | 0.63                        | 0.38                      | 0.62                      | 0.05                     |
| 32  | 12 x 8  | II  | -0.54                       | -0.56                     | -0.71                     | 0.04                     |
| 33  | 17 x 1  | III | 0.52                        | 0.39                      | -0.09                     | -0.03                    |
| 34  | 18 x 1  | III | -0.01                       | 0.72                      | 1.01*                     | 0.03                     |
| 35  | 19 x 1  | III | 0.24                        | 0.75                      | 0.35                      | -0.01                    |
| 36  | 20 x 1  | III | -0.85*                      | -1.20*                    | -0.07                     | 0.04                     |
| 37  | 17 x 2  | III | -0.13                       | 0.56                      | -0.97                     | -0.03                    |
| 38  | 18 x 2  | III | -0.47                       | -0.45                     | -0.43                     | 0.03                     |
| 39  | 19 x 2  | III | 0.30                        | -0.20                     | -0.25                     | 0.03                     |
| 40  | 20 x 2  | III | 0.36                        | -0.30                     | -0.30                     | -0.01                    |
| 41  | 17 x 3  | III | -0.52                       | -0.79*                    | 1.61*                     | 0.03                     |
| 42  | 18 x 3  | III | 0.91*                       | -0.41                     | -1.52*                    | 0.05                     |
| 43  | 19 x 3  | III | -0.54                       | 0.02                      | -0.81                     | -0.05                    |
| 44  | 20 x 3  | III | 0.18                        | 0.66                      | -0.65                     | -0.07                    |
| 45  | 17 x 4  | III | -0.01                       | -0.16                     | -0.82                     | 0.00                     |
| 46  | 18 x 4  | III | -0.51                       | -0.25                     | 0.19                      | 0.01                     |
| 47  | 19 x 4  | III | 0.32                        | -0.40                     | 0.19                      | 0.06                     |
| 48  | 20 x 4  | III | 0.34                        | 0.36                      | 0.18                      | -0.03                    |
| 49  | 13 x 21 | IV  | -0.22                       | -0.25                     | 0.10                      | -0.04                    |
| 50  | 14 x 21 | IV  | -0.48                       | -0.15                     | -0.38                     | -0.01                    |
| 51  | 15 x 21 | IV  | 0.23                        | 0.53                      | 0.66                      | 0.02                     |

Table S3 Contd.

| S/N | Hybrid  | Set | PVA<br>$\mu\text{g g}^{-1}$ | Fe<br>$\text{mg kg}^{-1}$ | Zn<br>$\text{mg kg}^{-1}$ | GY<br>$\text{t ha}^{-1}$ |
|-----|---------|-----|-----------------------------|---------------------------|---------------------------|--------------------------|
| 52  | 16 x 21 | IV  | 0.22                        | 0.12                      | 0.65                      | -0.02                    |
| 53  | 13 x 21 | IV  | 0.05                        | 0.33                      | 0.37                      | -0.02                    |
| 54  | 14 x 22 | IV  | 0.02                        | -0.28                     | -0.03                     | 0.00                     |
| 55  | 15 x 22 | IV  | -0.22                       | -0.04                     | -0.03                     | 0.02                     |
| 56  | 16 x 22 | IV  | 0.12                        | 0.35                      | 0.21                      | 0.01                     |
| 57  | 13 x 23 | IV  | -0.05                       | 0.37                      | 0.12                      | 0.01                     |
| 58  | 14 x 23 | IV  | 0.35                        | -0.07                     | 0.63                      | -0.01                    |
| 59  | 15 x 23 | IV  | -0.10                       | 0.22                      | -0.47                     | -0.02                    |
| 60  | 16 x 23 | IV  | 0.24                        | -0.27                     | -1.07*                    | 0.04                     |
| 61  | 13 x 24 | IV  | 0.12                        | -0.41                     | -1.03*                    | 0.04                     |
| 62  | 14 x 24 | IV  | 0.24                        | 0.37                      | -0.25                     | -0.02                    |
| 63  | 15 x 24 | IV  | -0.27                       | -1.00*                    | 0.17                      | -0.06                    |
| 64  | 16 x 24 | IV  | -0.34                       | 0.50                      | 0.34                      | 0.00                     |
| 65  | 5 x 13  | V   | -0.08                       | 0.20                      | -0.06                     | 0.02                     |
| 66  | 6 x 13  | V   | -0.02                       | -0.30                     | 1.01*                     | 0.02                     |
| 67  | 7 x 13  | V   | 0.39                        | 0.06                      | -0.86                     | 0.02                     |
| 68  | 8 x 13  | V   | -0.37                       | -0.26                     | -0.44                     | 0.00                     |
| 69  | 5 x 14  | V   | 0.48                        | 0.24                      | -0.51                     | 0.05                     |
| 70  | 6 x 14  | V   | -0.23                       | -0.20                     | 0.40                      | -0.02                    |
| 71  | 7 x 14  | V   | -0.16                       | 0.30                      | 1.90                      | -0.19                    |
| 72  | 8 x 14  | V   | -0.03                       | -0.55                     | -0.98                     | 0.02                     |
| 73  | 5 x 15  | V   | 0.10                        | -0.21                     | 1.08*                     | -0.06                    |
| 74  | 6 x 15  | V   | 0.30                        | 0.26                      | -3.02**                   | 0.00                     |
| 75  | 7 x 15  | V   | -0.18                       | -0.67                     | 0.31                      | 0.04                     |
| 76  | 8 x 15  | V   | -0.61*                      | 0.02                      | 1.06*                     | 0.02                     |
| 77  | 5 x 16  | V   | -0.82*                      | -0.20                     | -0.49                     | 0.03                     |

Table S3 Contd.

| S/N | Hybrid  | Set | PVA<br>$\mu\text{g g}^{-1}$ | Fe<br>$\text{mg kg}^{-1}$ | Zn<br>$\text{mg kg}^{-1}$ | GY<br>$\text{t ha}^{-1}$ |
|-----|---------|-----|-----------------------------|---------------------------|---------------------------|--------------------------|
|     |         |     |                             | 1                         |                           |                          |
| 78  | 6x 16   | V   | 0.25                        | 0.31                      | 1.29*                     | -0.06                    |
| 79  | 7 x 16  | V   | -0.10                       | 0.40                      | 0.37                      | 0.00                     |
| 80  | 8 x 16  | V   | 0.93*                       | -0.27                     | 0.22                      | 0.06                     |
| 81  | 21 x 17 | VI  | -0.15                       | 0.27                      | 0.10                      | -0.02                    |
| 82  | 22 x 17 | VI  | 0.09                        | -0.60                     | -0.84                     | 0.01                     |
| 83  | 23 x 17 | VI  | 0.06                        | 0.89*                     | -0.01                     | -0.01                    |
| 84  | 24 x 17 | VI  | -0.03                       | -0.02                     | -0.29                     | -0.02                    |
| 85  | 21 x 18 | VI  | 0.24                        | 0.41                      | -0.31                     | -0.02                    |
| 86  | 22 x 18 | VI  | 0.21                        | 0.54                      | 0.91                      | 0.06                     |
| 87  | 23 x 18 | VI  | -0.64*                      | -0.32                     | -0.01                     | 0.01                     |
| 88  | 24 x 18 | VI  | 0.12                        | -0.99*                    | -1.27*                    | 0.01                     |
| 89  | 21 x 19 | VI  | 0.24                        | 0.06                      | -0.21                     | -0.01                    |
| 90  | 22 x 19 | VI  | 0.21                        | 0.04                      | -0.46                     | 0.02                     |
| 91  | 23 x 19 | VI  | -0.64                       | -0.19                     | -0.11                     | 0.00                     |
| 92  | 24 x 19 | VI  | 0.12                        | 0.45                      | 0.68                      | 0.00                     |
| 93  | 21 x 20 | VI  | -0.12                       | -0.36                     | 0.07                      | 0.00                     |
| 94  | 22 x 20 | VI  | 0.21                        | 0.58                      | 0.10                      | -0.04                    |
| 95  | 23 x 20 | VI  | 0.35                        | -0.21                     | -1.30*                    | -0.02                    |
| 96  | 24 x 20 | VI  | -0.28                       | -0.23                     | -0.45                     | -0.02                    |
| SE  |         |     | 0.43                        | 0.57                      | 0.78                      | 0.02                     |

PVA: Provitamin A, SE: Standard error.

**Table S4.** Mean values for agronomic traits of 96 hybrids and 4 checks evaluated across environments

| S/N | Hybrid | DA    | DS    | ASI  | PH    | EH    | PA   | EA   |
|-----|--------|-------|-------|------|-------|-------|------|------|
| 1   | 1 x 9  | 60.9  | 62.75 | 1.84 | 197.8 | 103.9 | 2.45 | 2.20 |
| 2   | 2 x 9  | 61.02 | 62.66 | 1.64 | 216.6 | 110.4 | 2.42 | 2.56 |
| 3   | 3 x9   | 59.82 | 61.2  | 1.38 | 202.1 | 95.4  | 2.76 | 2.71 |
| 4   | 4 x 9  | 61.68 | 63.33 | 1.65 | 226.5 | 123   | 2.5  | 2.28 |
| 5   | 1 x10  | 62.32 | 64.21 | 1.89 | 196.8 | 99.81 | 2.84 | 2.9  |
| 6   | 2 x 10 | 62.77 | 64.37 | 1.60 | 176.2 | 90.88 | 3.31 | 3.36 |
| 7   | 3 x 10 | 59.4  | 61.27 | 1.87 | 200.8 | 87.29 | 3.19 | 3.08 |
| 8   | 4 x 10 | 61.74 | 63.4  | 1.66 | 213.2 | 108.8 | 2.45 | 2.12 |
| 9   | 1 x 11 | 62.2  | 64.08 | 1.88 | 185.2 | 101.3 | 3.33 | 2.80 |
| 10  | 2 x 11 | 60.37 | 62.08 | 1.70 | 196.5 | 93.04 | 2.96 | 2.38 |
| 11  | 3 x 11 | 59.39 | 61.82 | 2.42 | 185.2 | 84.84 | 3.32 | 3.30 |
| 12  | 4 x 11 | 61.67 | 63.43 | 1.75 | 197.2 | 105.5 | 2.86 | 2.20 |
| 13  | 1 x12  | 61.72 | 63.51 | 1.79 | 199.6 | 102.6 | 2.52 | 2.93 |
| 14  | 2 x 12 | 62.22 | 63.7  | 1.48 | 225.7 | 113.4 | 2.37 | 2.40 |
| 15  | 3 x 12 | 59.97 | 61.39 | 1.42 | 205.6 | 97.42 | 2.51 | 2.75 |
| 16  | 4 x 12 | 61.79 | 63.53 | 1.74 | 229.2 | 119   | 2.62 | 2.76 |
| 17  | 9 x 5  | 60.43 | 62.17 | 1.74 | 219.4 | 112.1 | 2.31 | 2.32 |
| 18  | 10 x 5 | 60.94 | 62.35 | 1.41 | 203.9 | 100.9 | 2.62 | 2.62 |
| 19  | 11 x 5 | 61.22 | 62.99 | 1.76 | 189.3 | 90.98 | 2.87 | 3.13 |
| 20  | 12 x 5 | 61.09 | 62.83 | 1.74 | 215.3 | 106.7 | 2.43 | 2.49 |
| 21  | 9 x 6  | 61.79 | 63.26 | 1.47 | 219.2 | 116.4 | 2.02 | 1.99 |
| 22  | 10 x 6 | 60.93 | 62.53 | 1.59 | 216.7 | 102.1 | 2.16 | 2.14 |
| 23  | 11 x 6 | 61.42 | 63.01 | 1.50 | 198.1 | 99.11 | 2.70 | 2.39 |
| 24  | 12 x 6 | 61    | 62.32 | 1.31 | 220.9 | 111.4 | 1.92 | 1.70 |
| 25  | 9 x 7  | 61.31 | 62.75 | 1.43 | 227.8 | 124.2 | 2.38 | 1.74 |
| 26  | 10 x 7 | 61.49 | 62.88 | 1.38 | 209.8 | 106.5 | 2.56 | 2.37 |

|    |        |       |       |      |       |       |      |      |
|----|--------|-------|-------|------|-------|-------|------|------|
| 27 | 11 x 7 | 60.57 | 62.2  | 1.63 | 199.5 | 106.4 | 2.68 | 2.46 |
| 28 | 12 x 7 | 61.59 | 63.05 | 1.46 | 228.2 | 123.7 | 2.32 | 2.35 |
| 29 | 9 x 8  | 60.86 | 62.5  | 1.63 | 217.1 | 114.6 | 2.16 | 2.55 |

---



Table S4 contd.

| S/N | Hybrid  | DA    | DS    | ASI  | PH     | EH     | PA   | EA   |
|-----|---------|-------|-------|------|--------|--------|------|------|
| 30  | 10 x 8  | 60.63 | 62.27 | 1.65 | 222.00 | 112.20 | 2.32 | 2.54 |
| 31  | 11 x 8  | 61.66 | 63.41 | 1.75 | 209.00 | 100.30 | 2.57 | 2.20 |
| 32  | 12 x 8  | 60.83 | 62.65 | 1.83 | 234.40 | 121.00 | 2.09 | 2.16 |
| 33  | 17 x 1  | 58.92 | 60.55 | 1.63 | 188.80 | 94.75  | 2.78 | 2.90 |
| 34  | 18 x 1  | 60.70 | 61.81 | 1.12 | 208.00 | 104.10 | 2.46 | 2.72 |
| 35  | 19 x 1  | 61.98 | 64.02 | 2.04 | 209.00 | 108.40 | 2.69 | 2.76 |
| 36  | 20 x 1  | 61.03 | 62.62 | 1.59 | 210.30 | 99.95  | 2.41 | 2.63 |
| 37  | 17 x 2  | 59.40 | 61.59 | 2.19 | 202.40 | 101.80 | 2.48 | 3.14 |
| 38  | 18 x 2  | 60.62 | 62.28 | 1.66 | 226.10 | 108.90 | 2.26 | 2.54 |
| 39  | 19 x 2  | 60.51 | 61.7  | 1.19 | 215.60 | 101.90 | 2.48 | 2.36 |
| 40  | 20 x 2  | 59.79 | 61.38 | 1.59 | 221.60 | 107.40 | 2.88 | 2.76 |
| 41  | 17 x 3  | 60.66 | 62.5  | 1.84 | 200.30 | 90.52  | 2.58 | 2.19 |
| 42  | 18 x 3  | 58.60 | 60.12 | 1.51 | 223.80 | 96.58  | 2.76 | 2.82 |
| 43  | 19 x 3  | 57.62 | 59.83 | 2.20 | 214.00 | 96.06  | 2.92 | 3.04 |
| 44  | 20 x 3  | 60.36 | 61.98 | 1.62 | 189.90 | 83.80  | 3.21 | 3.26 |
| 45  | 17 x 4  | 59.31 | 61.02 | 1.70 | 203.20 | 99.66  | 2.44 | 2.58 |
| 46  | 18 x 4  | 58.63 | 60.27 | 1.64 | 224.90 | 113.70 | 2.28 | 2.13 |
| 47  | 19 x 4  | 60.63 | 62.24 | 1.61 | 225.40 | 113.40 | 2.53 | 2.44 |
| 48  | 20 x 4  | 59.39 | 61.02 | 1.62 | 206.70 | 98.67  | 2.83 | 2.48 |
| 49  | 13 x 21 | 59.24 | 61.13 | 1.88 | 196.10 | 99.95  | 2.51 | 2.67 |
| 50  | 14 x 21 | 57.13 | 58.66 | 1.52 | 191.80 | 96.32  | 2.80 | 2.49 |
| 51  | 15 x 21 | 59.30 | 61.05 | 1.74 | 189.40 | 91.13  | 2.71 | 2.49 |
| 52  | 16 x 21 | 59.53 | 61.17 | 1.64 | 195.30 | 102.30 | 2.31 | 2.44 |
| 53  | 13 x 22 | 60.39 | 62.09 | 1.69 | 220.20 | 101.80 | 2.66 | 2.49 |
| 54  | 14 x 22 | 59.90 | 61.61 | 1.71 | 210.20 | 94.74  | 2.31 | 2.40 |
| 55  | 15 x 22 | 60.97 | 62.7  | 1.72 | 201.70 | 86.71  | 2.62 | 2.35 |

|    |         |       |       |      |        |        |      |      |
|----|---------|-------|-------|------|--------|--------|------|------|
| 56 | 16 x 22 | 61.27 | 63.17 | 1.89 | 207.00 | 95.64  | 2.32 | 2.02 |
| 57 | 13 x 23 | 60.86 | 62.43 | 1.57 | 204.40 | 102.20 | 2.31 | 2.49 |
| 58 | 14 x 23 | 61.27 | 62.95 | 1.68 | 202.80 | 107.50 | 2.51 | 2.03 |
| 59 | 15 x 23 | 62.43 | 64.22 | 1.78 | 193.50 | 87.64  | 3.05 | 2.57 |
| 60 | 16 x 23 | 62.79 | 64.64 | 1.84 | 196.70 | 102.10 | 1.94 | 1.69 |

---

Table S4 contd.

| S/N | Hybrid  | DA    | DS    | ASI  | PH     | EH     | PA   | EA   |
|-----|---------|-------|-------|------|--------|--------|------|------|
| 61  | 13 x 24 | 58.19 | 59.76 | 1.57 | 202.40 | 94.40  | 2.76 | 2.75 |
| 62  | 14 x 24 | 57.86 | 59.35 | 1.49 | 199.00 | 97.80  | 2.79 | 2.72 |
| 63  | 15 x 24 | 59.21 | 60.66 | 1.45 | 187.30 | 82.28  | 3.16 | 2.86 |
| 64  | 16 x 24 | 60.03 | 61.75 | 1.72 | 194.40 | 94.30  | 2.72 | 2.54 |
| 65  | 5 x 13  | 59.46 | 61.30 | 1.84 | 226.80 | 103.60 | 2.04 | 2.54 |
| 66  | 6 x 13  | 60.25 | 61.97 | 1.72 | 218.80 | 110.10 | 1.90 | 2.01 |
| 67  | 7 x 13  | 59.93 | 61.71 | 1.78 | 238.20 | 124.90 | 2.38 | 2.30 |
| 68  | 8 x 13  | 60.52 | 62.53 | 2.01 | 233.00 | 122.20 | 2.38 | 2.76 |
| 69  | 5 x 14  | 60.26 | 61.89 | 1.63 | 200.30 | 104.60 | 2.68 | 2.40 |
| 70  | 6 x 14  | 61.67 | 62.59 | 0.92 | 202.40 | 101.20 | 2.73 | 2.24 |
| 71  | 7 x14   | 64.28 | 65.51 | 1.23 | 178.30 | 92.86  | 3.51 | 3.71 |
| 72  | 8 x 14  | 61.17 | 62.82 | 1.65 | 217.70 | 108.40 | 2.43 | 2.61 |
| 73  | 5 x 15  | 61.74 | 63.38 | 1.64 | 205.20 | 87.44  | 2.99 | 2.65 |
| 74  | 6 x 15  | 57.31 | 58.67 | 1.36 | 194.80 | 87.82  | 2.76 | 3.06 |
| 75  | 7 x 15  | 61.18 | 62.95 | 1.76 | 215.30 | 97.24  | 2.13 | 2.63 |
| 76  | 8 x 15  | 60.83 | 62.64 | 1.81 | 219.10 | 101.50 | 2.13 | 2.35 |
| 77  | 5 x 16  | 61.84 | 63.35 | 1.51 | 209.80 | 104.70 | 2.44 | 2.40 |
| 78  | 6 x 16  | 63.00 | 64.66 | 1.66 | 203.00 | 102.70 | 2.35 | 2.26 |
| 79  | 7 x 16  | 61.95 | 63.60 | 1.66 | 214.80 | 119.50 | 2.47 | 2.32 |
| 80  | 8 x 16  | 61.47 | 63.09 | 1.62 | 211.70 | 110.60 | 2.19 | 1.96 |
| 81  | 21 x 17 | 56.58 | 57.88 | 1.30 | 180.70 | 86.46  | 2.90 | 2.66 |
| 82  | 22 x 17 | 56.99 | 58.40 | 1.41 | 189.30 | 84.46  | 2.69 | 2.56 |
| 83  | 23 x 17 | 60.39 | 62.22 | 1.82 | 188.00 | 92.12  | 2.57 | 2.50 |
| 84  | 24 x 17 | 56.80 | 58.26 | 1.46 | 185.40 | 83.88  | 3.06 | 2.98 |

|    |         |       |       |      |        |        |      |      |
|----|---------|-------|-------|------|--------|--------|------|------|
| 85 | 21 x 18 | 58.80 | 60.26 | 1.46 | 199.10 | 98.10  | 2.64 | 2.84 |
| 86 | 22 x 18 | 58.06 | 59.26 | 1.20 | 216.90 | 98.22  | 2.37 | 2.16 |
| 87 | 23 x 18 | 60.72 | 62.34 | 1.63 | 218.40 | 106.30 | 2.70 | 1.86 |
| 88 | 24 x 18 | 56.38 | 57.74 | 1.37 | 195.70 | 88.51  | 3.15 | 2.37 |
| 89 | 21 x 19 | 57.36 | 58.98 | 1.62 | 192.70 | 91.12  | 2.77 | 2.63 |

---

Table S4 contd.

| S/N          | Hybrids | DA    | DS    | ASI  | PH     | EH     | PA   | EA   |
|--------------|---------|-------|-------|------|--------|--------|------|------|
| 90           | 22 x 19 | 59.12 | 60.30 | 1.18 | 199.70 | 91.54  | 2.87 | 2.71 |
| 91           | 23 x 19 | 60.82 | 62.67 | 1.85 | 192.30 | 96.44  | 3.10 | 2.43 |
| 92           | 24 x 19 | 57.06 | 58.67 | 1.61 | 198.40 | 95.12  | 2.99 | 2.65 |
| 93           | 21 x 20 | 56.03 | 57.64 | 1.61 | 180.40 | 88.63  | 3.06 | 2.87 |
| 94           | 22 x 20 | 59.20 | 60.58 | 1.38 | 193.40 | 83.25  | 3.01 | 2.68 |
| 95           | 23 x 20 | 61.89 | 63.26 | 1.37 | 185.80 | 92.18  | 3.03 | 2.64 |
| 96           | 24 x 20 | 57.18 | 58.50 | 1.32 | 192.80 | 88.09  | 3.17 | 2.91 |
| Ife Hybrid-3 | Check   | 58.90 | 60.43 | 1.53 | 188.90 | 91.91  | 2.34 | 2.25 |
| Ife Hybrid-4 | Check   | 62.13 | 64.16 | 2.04 | 223.00 | 114.40 | 2.40 | 1.80 |
| M1124-31     | Check   | 59.34 | 61.06 | 1.73 | 202.20 | 100.40 | 2.41 | 2.05 |
| Oba Super 2  | Check   | 60.40 | 62.02 | 1.63 | 192.10 | 95.20  | 2.96 | 2.89 |
| Grand mean   |         | 60.26 | 61.8  | 1.63 | 205.51 | 100.87 | 2.61 | 2.52 |
| LSD(p<0.05)  |         | 0.67  | 0.67  | 0.33 | 10.03  | 6.93   | 0.17 | 0.16 |

DA: no. of days to anthesis, DS: no. of days to silking ASI : anthesis silking interval (days to 50% silking minus days to 50% male flowering), EH : Ear height, PH : plant height, PA : plant aspect and EA : ear aspect, LSD: Least Significant difference.

**Table S5:** The Physical and chemical properties of soils (0-30cm) of the study sites

| Soil properties                                  | 2020       |            | 2021       |            | Critical level (Chude et al., 2012) |
|--------------------------------------------------|------------|------------|------------|------------|-------------------------------------|
|                                                  | Ikenne     | Saminaka   | Ikenne     | Saminaka   |                                     |
| pH (1:1, H <sub>2</sub> O)                       | 4.7        | 5.0        | 4.7        | 5.6        | Neutral 6.6-7.2                     |
| Organic carbon (mgkg <sup>-1</sup> )             | 9.5        | 7.4        | 9.6        | 7.9        | 10-14                               |
| Total Nitrogen (gkg <sup>-1</sup> )              | 1.1        | 1.2        | 0.9        | 1.0        |                                     |
| Available P (mgkg <sup>-1</sup> )                | 28.7       | 72.2       | 23.5       | 65.6       | 16-2.0                              |
| Exchangeable acidity                             | 0.9        | 0.9        | 1.0        | 0.9        |                                     |
| Exchangeable cations (cmol kg <sup>-1</sup> )    |            |            |            |            |                                     |
| K                                                | 1.1        | 0.5        | 1.0        | 0.3        |                                     |
| Mg                                               | 1.2        | 0.3        | 1.2        | 0.4        | 0.3-0.6                             |
| Ca                                               | 2.3        | 0.3        | 2.6        | 0.3        |                                     |
| Na                                               | 0.5        | 0.2        | 0.7        | 0.2        |                                     |
| Extractable micronutrients (mgkg <sup>-1</sup> ) |            |            |            |            |                                     |
| Fe                                               | 18.5       | 170.4      | 30.5       | 140.3      |                                     |
| Mn                                               | 53.4       | 18.0       | 58.7       | 20.5       |                                     |
| Cu                                               | 3.0        | 1.6        | 2.8        | 1.4        |                                     |
| Zn                                               | 2.5        | 8.0        | 2.1        | 7.0        |                                     |
| Particle Size distribution (gkg <sup>-1</sup> )  |            |            |            |            |                                     |
| Sand                                             | 820.0      | 720        | 812.0      | 740.0      |                                     |
| Silt                                             | 80.0       | 200        | 88.0       | 192.0      |                                     |
| Clay                                             | 100.0      | 80         | 102.0      | 68.0       |                                     |
| Textural class (USDA)                            | Loamy sand | Sandy loam | Loamy sand | Sandy loam |                                     |

**Table S6:** Agroecological zones, average rainfall, temperature, relative humidity and soil type of the study locations

| Locations | Agroecology                   | Average rainfall/month<br>(mm) |       | Average temperature<br>/month<br>(°C) |      | Average<br>Relative<br>Humidity (%) |      | Soil Type (FAO<br>Classification)                 |
|-----------|-------------------------------|--------------------------------|-------|---------------------------------------|------|-------------------------------------|------|---------------------------------------------------|
|           |                               | 2020                           | 2021  | 2020                                  | 2021 | 2020                                | 2021 |                                                   |
| Ikenne    | Rainforest                    | 103.6                          | 106.6 | 28.0                                  | 27.9 | 87.0                                | 87.8 | Luvisols, Acrisols,<br>Ferrasols and<br>Lithosols |
| Saminaka  | Southern<br>guinea<br>savanna | 79.5                           | 62.2  | 25.0                                  | 24.9 | 63.0                                | 61.4 |                                                   |

Source: IITA Geographic Information System
